# Supplementary material for: Varying chiral ratio of pinic acid enantiomers above the Amazon rainforest
Source: Copernicus journal article supplement (doi:10.5194/acp-23-809-2023), 2023-01-18
Supplement: Supplementary file 1 [file acp-23-809-2023-supplement.pdf]

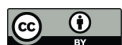

*Supplement of*

## **Varying chiral ratio of pinic acid enantiomers above the Amazon rainforest**

**Denis Leppla et al.**

*Correspondence to:* Thorsten Hoffmann (t.hoffmann@uni-mainz.de)

The copyright of individual parts of the supplement might differ from the article licence.

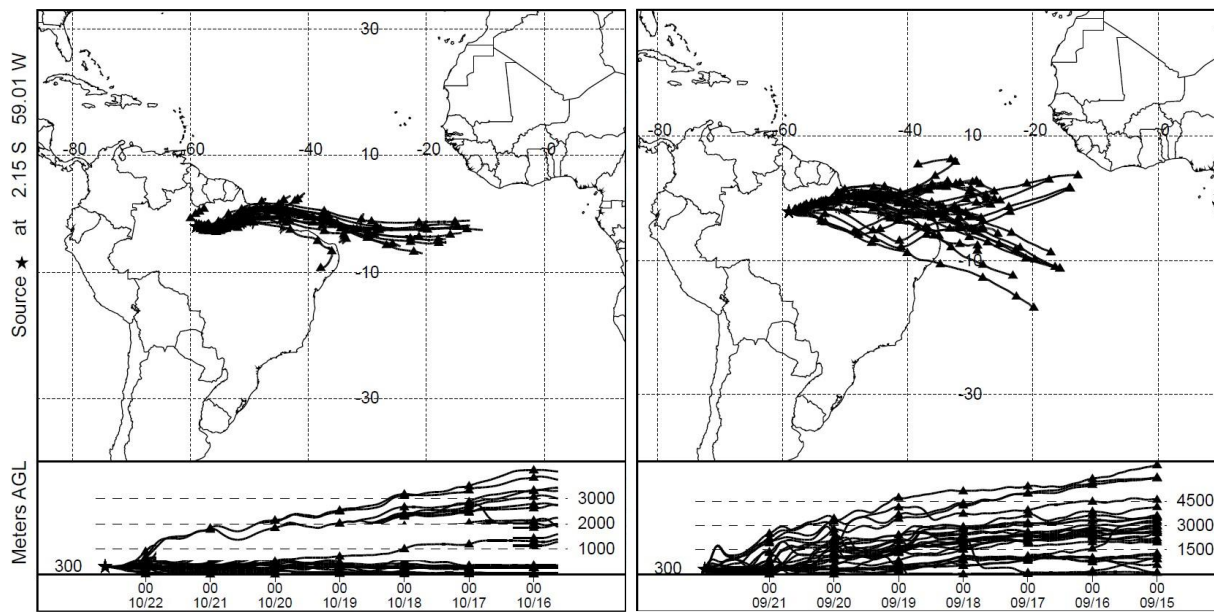

Figure S1: The 7 d HYSPLIT (Stein et al., 2015) backward trajectories starting at 300 m above ground level for the dry season 2018 campaign (left) and 2019 campaign (right).

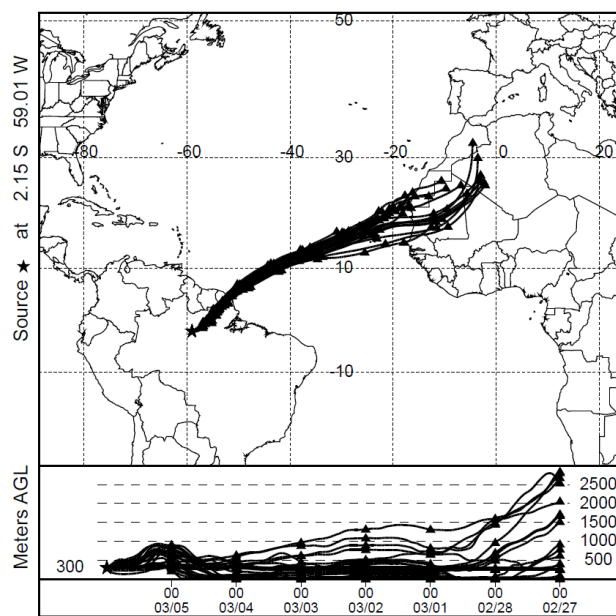

5 Figure S2: The 7 d HYSPLIT backward trajectories starting at 300 m above ground level for the wet seasons 2019 campaign.

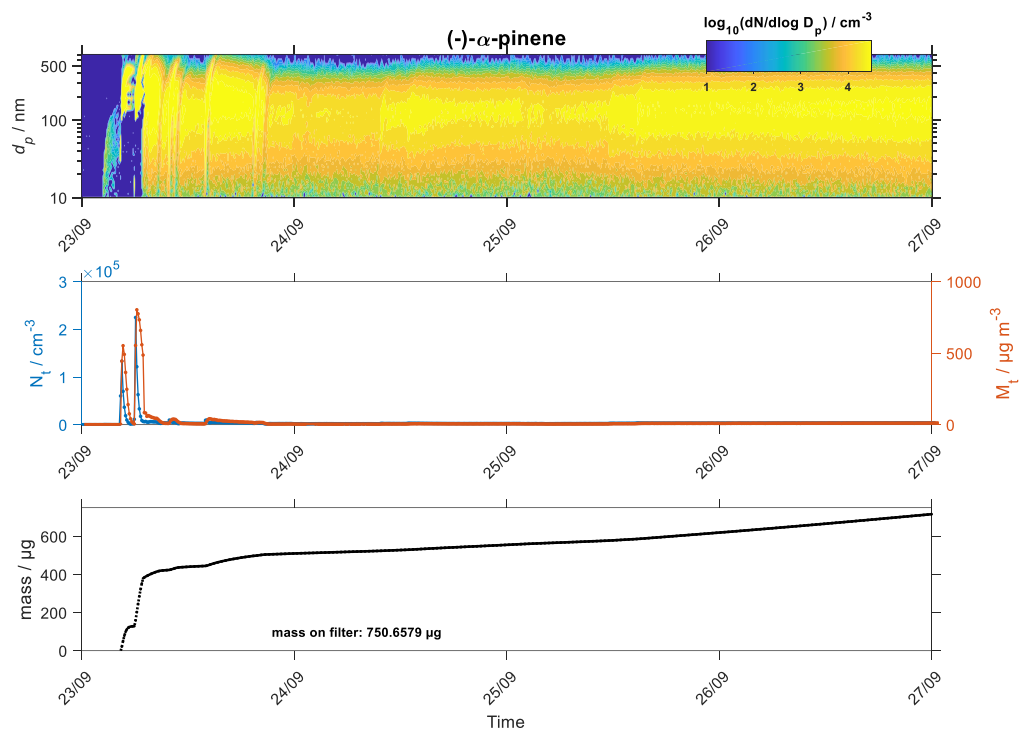

**Figure S3: SMPS data of the chamber experiment of (-)- $\alpha$ -pinene and ozone. Additionally, the total particle number ( $N_t$ ) and total particle mass ( $M_t$ ) are displayed as well as the collected aerosol mass on the filter.**

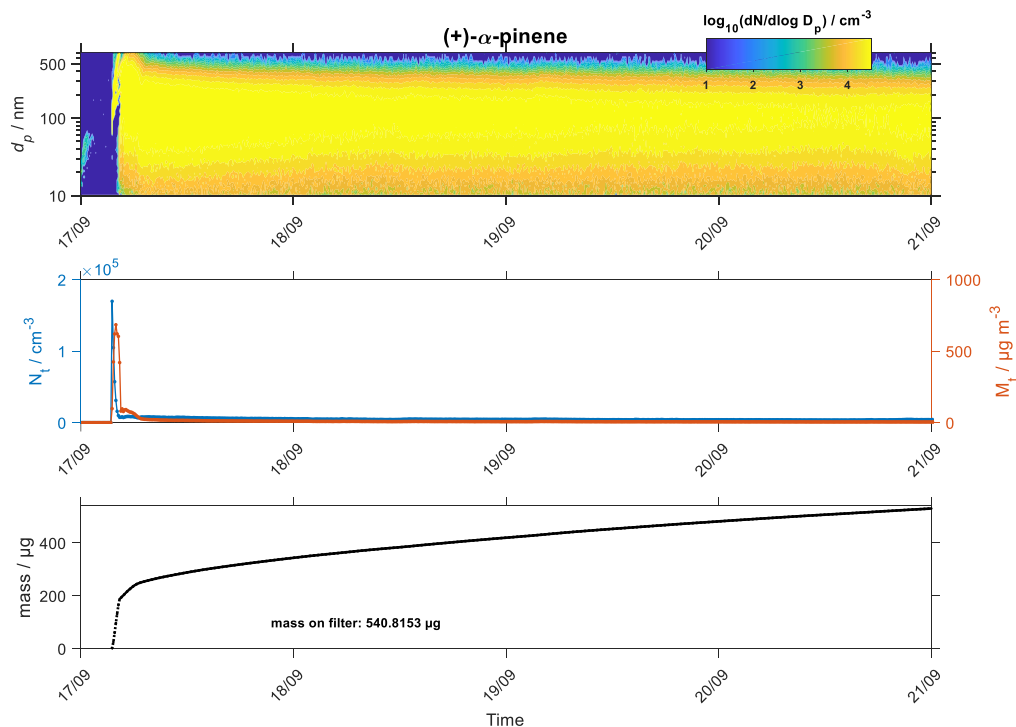

10 **Figure S4:** SMPS data of the chamber experiment of (+)- $\alpha$ -pinene and ozone. Additionally, the total particle number ( $N_t$ ) and total particle mass ( $M_t$ ) are displayed as well as the collected aerosol mass on the filter.

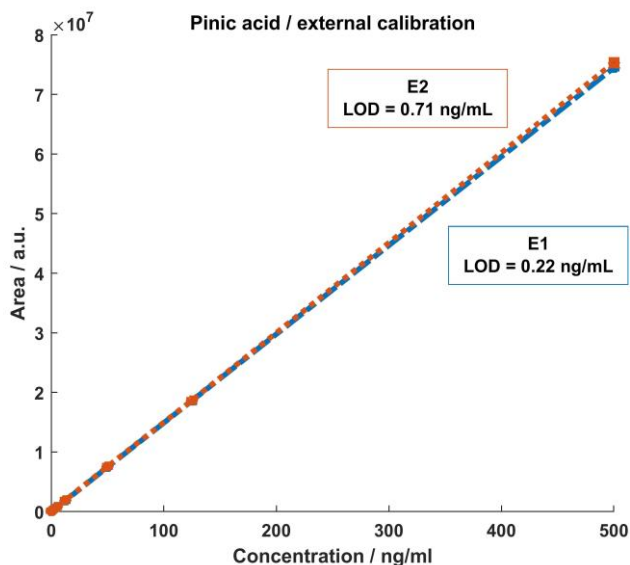

**Figure S5:** External calibration for the pinic acid enantiomers. Both structures show similar signal areas for increasing standard concentrations. The calculated limit of detection is below 1 ng/ml for both stereoisomers.

15

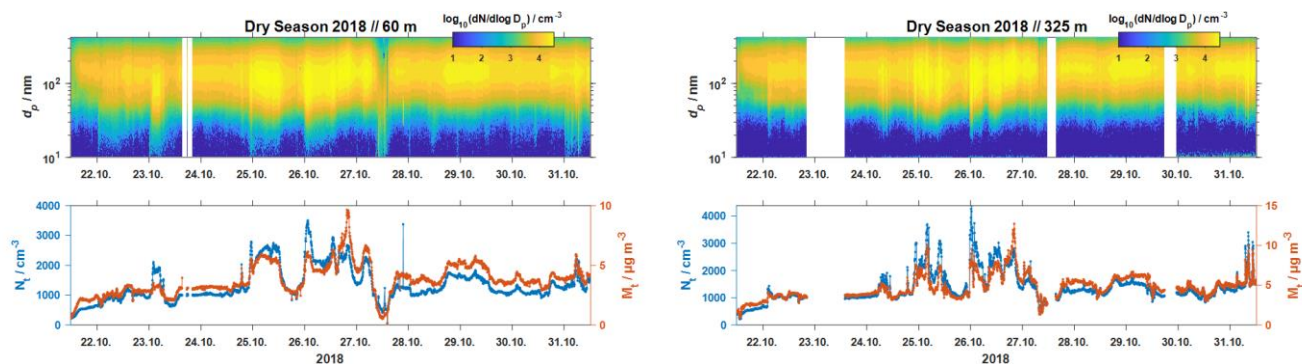

Figure S6: SMPS data for the dry season 2018 at 60 m and 325 m altitude. The calculated total particle numbers and total particle masses are illustrated in the lower panels. The instruments did not work during the 23., 27., and 30.10.2018.

20

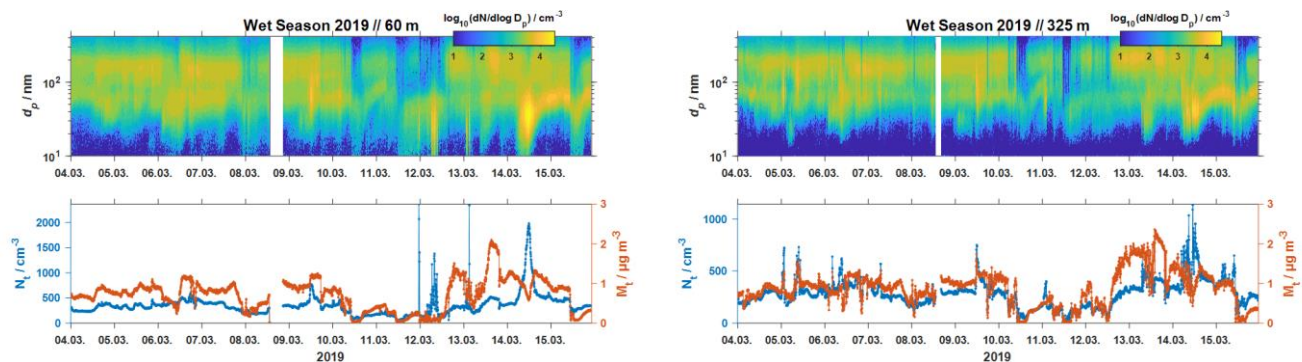

Figure S7: SMPS data for the wet season 2019 at 60 m and 325 m altitude. The calculated total particle numbers and total particle masses are illustrated in the lower panels. The instruments did not work during the 08. and 12.03.2019.

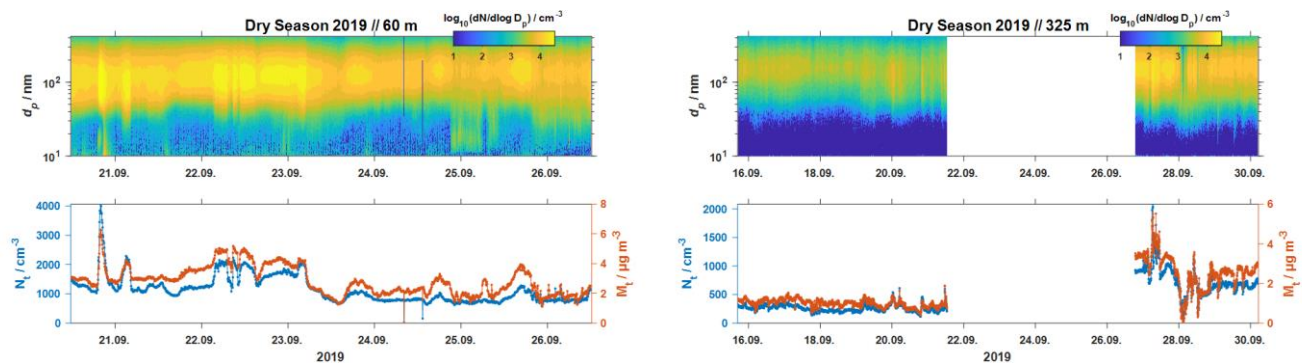

Figure S8: SMPS data for the dry season 2019 at 60 m and 325 m altitude. The calculated total particle numbers and total particle masses are illustrated in the lower panels. The instrument at 325m did not work between the 21.09. and 27.09.2019. Thus, a longer period is displayed.

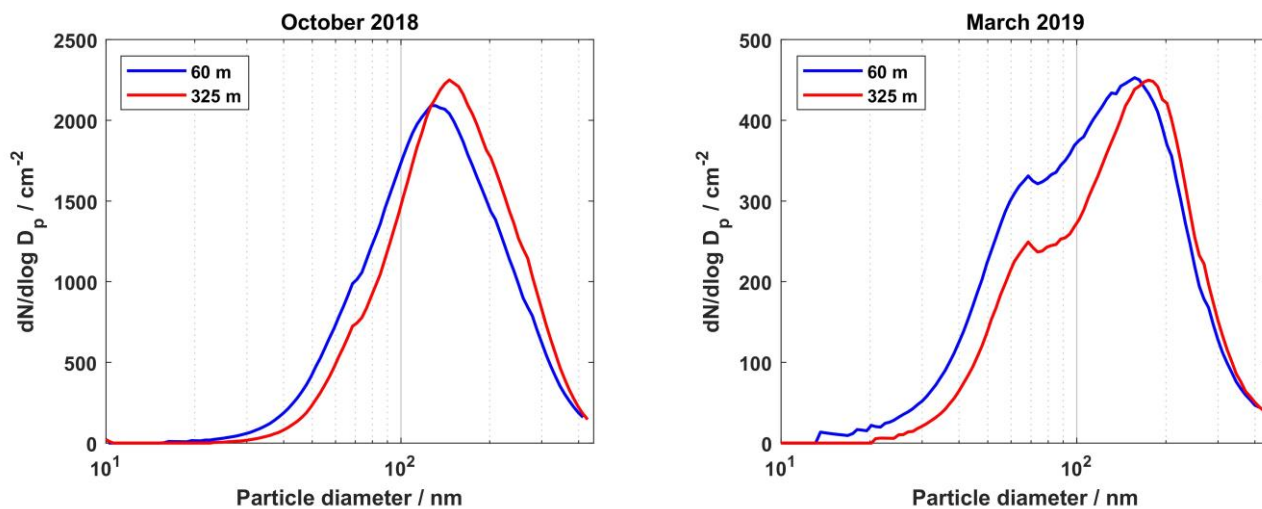

25

**Figure S9:** Typical median particle number size distributions for the dry season (left) and wet season (right). The wet season is characterized by a bimodal distribution with two maxima at roughly 70 nm and 150 nm particle diameter.

## References

- Stein, A. F., Draxler, R. R., Rolph, G. D., Stunder, B. J. B., Cohen, M. D., and Ngan, F.: NOAA's HYSPLIT Atmospheric  
 30 Transport and Dispersion Modeling System, *Bulletin of the American Meteorological Society*, 96, 2059–2077,  
<https://doi.org/10.1175/BAMS-D-14-00110.1>, 2015.
